# Supplementary material for: A dual regulation mechanism of histidine kinase CheA identified by combining network-dynamics modeling and system-level input-output data
Source: PubMed Central journal article supplement (PMC6044545; doi:10.1371/journal.pcbi.1006305), 2018-07-02
Supplement: pcbi.1006305.s001.pdf [file pcbi.1006305.s001.pdf]

Supplementary Material to  
 A dual regulation mechanism of histidine kinase CheA identified by combining  
 network-dynamics modeling and system-level input-output data  
 Bernardo A. Mello, Wenlin Pan, Gerald L. Hazelbauer, and Yuhai Tu

## Appendix 1

### The full mathematical model

The concentrations of the nine enzyme configurations shown in Fig. 1 are described by the vector  $\vec{E}$ , defined as

$$\vec{E}(t) = \begin{bmatrix} [\text{ATP} \cdot E \cdot \text{P1}](t) \\ [\text{ATP} \cdot E \cdot ](t) \\ [\text{ATP} \cdot E \cdot \text{P1P}](t) \\ [ \cdot E \cdot \text{P1} ](t) \\ [ \cdot E \cdot ](t) \\ [ \cdot E \cdot \text{P1P} ](t) \\ [\text{ADP} \cdot E \cdot \text{P1}](t) \\ [\text{ADP} \cdot E \cdot ](t) \\ [\text{ADP} \cdot E \cdot \text{P1P}](t) \end{bmatrix}. \quad (\text{A})$$

The total enzyme concentration,  $[E]_{\text{tot}}$ , must be equal to the sum of the components of  $\vec{E}$ , which we define as the norm  $\|\vec{E}(t)\|$ . Enzyme conservation imposes

$$[E]_{\text{tot}} = \|\vec{E}(t)\| = \text{Constant}. \quad (\text{B})$$

The experimental protocol results in the components of  $\vec{E}$  been initially null, except the states  $[ \cdot E \cdot ]$  and  $[ \cdot E \cdot \text{P1} ]$ . We assume these configurations are in equilibrium at  $t = 0$ , with the values

$$[ \cdot E \cdot \text{P1} ](0) = f^{\text{P1}}[E]_{\text{tot}}, \quad (\text{Ca})$$

$$[ \cdot E \cdot ](0) = (1 - f^{\text{P1}})[E]_{\text{tot}}, \quad (\text{Cb})$$

where  $f^{\text{P1}}$  is

$$f^{\text{P1}} = \frac{[\text{P1}]}{K_d^{\text{P1}} + [\text{P1}]}. \quad (\text{D})$$

An equivalent approach was used in simulations with pre-mixing with ATP instead of P1.

The evolution of the enzyme vector is described by the equation

$$\frac{d\vec{E}}{dt} = A\vec{E}, \quad (\text{E})$$

where  $A$  is the transition matrix

$$A = \begin{bmatrix} -k_{\text{off}}^{\text{ATP}} - k_{\text{off}}^{\text{P1}} - k_f^P & \omega^{\text{P1}} & 0 & \omega^{\text{ATP}} \\ k_{\text{off}}^{\text{P1}} & -k_{\text{off}}^{\text{ATP}} - \omega^{\text{P1}} & k_{\text{off}}^{\text{P1P}} & 0 \\ 0 & 0 & -k_{\text{off}}^{\text{ATP}} - k_{\text{off}}^{\text{P1P}} & 0 \\ k_{\text{off}}^{\text{ATP}} & 0 & 0 & -\omega^{\text{ATP}} - k_{\text{off}}^{\text{P1}} \\ 0 & k_{\text{off}}^{\text{ATP}} & 0 & k_{\text{off}}^{\text{P1}} \\ 0 & 0 & k_{\text{off}}^{\text{ATP}} & 0 \\ 0 & 0 & 0 & 0 \\ 0 & 0 & 0 & 0 \\ k_f^P & 0 & 0 & 0 \\ 0 & 0 & 0 & k_r^P \\ \omega^{\text{ATP}} & 0 & 0 & 0 \\ 0 & \omega^{\text{ATP}} & 0 & 0 \\ \omega^{\text{P1}} & 0 & k_{\text{off}}^{\text{ADP}} & 0 \\ -\omega^{\text{ATP}} - \omega^{\text{P1}} & k_{\text{off}}^{\text{P1P}} & 0 & k_{\text{off}}^{\text{ADP}} \\ 0 & -\omega^{\text{ATP}} - k_{\text{off}}^{\text{P1P}} & 0 & k_{\text{off}}^{\text{ADP}} \\ 0 & 0 & -k_{\text{off}}^{\text{ADP}} - k_{\text{off}}^{\text{P1}} & \omega^{\text{P1}} \\ 0 & 0 & k_{\text{off}}^{\text{P1}} & -k_{\text{off}}^{\text{ADP}} - \omega^{\text{P1}} \\ 0 & 0 & 0 & -k_{\text{off}}^{\text{ADP}} - k_{\text{off}}^{\text{P1P}} - k_r^P \end{bmatrix}. \quad (\text{F})$$

Table A contains the definitions of the parameters used in this matrix. In the general case we should include in the above matrix the rate constants  $\omega^{\text{ADP}}$  and  $\omega^{\text{P1P}}$ , which were excluded because  $[\text{ADP}] \approx [P1P] \approx 0$ . Furthermore, the matrix  $A$  could be time-dependent, through the rates  $\omega^{\text{ATP}}$  and  $\omega^{\text{P1}}$  which depend on  $[\text{ATP}]$  and  $[P1]$ . Due to the minimum consumption of these substances, we assume the matrix to be constant.

The matrix  $A$  is the infinitesimal generator of the continuous time Markov process describing  $\vec{E}$  evolution. All eigenvalues  $\lambda_i$  of such matrices are negative, except for of one which is null,  $\lambda_0 = 0$ .

By using the eigenvectors  $\vec{E}_i$  of  $A$ , the initial state can be written as

$$\vec{E}(0) = \sum_{i=0}^8 c_i \vec{E}_i, \quad (\text{G})$$

where the coefficients  $c_i$  are determined by solving this linear system at time  $t = 0$ . With these coefficients, the state of the enzyme as function of time can be written as

$$\vec{E}(t) = c_0 \vec{E}_0 + \sum_{i=1}^8 c_i \vec{E}_i e^{-t/\tau_i}, \quad (\text{H})$$

where we used the timescale associated with each eigenvalue,

$$\tau_i = -\frac{1}{\lambda_i}. \quad (\text{I})$$

We choose the index of the eigenvalues such that  $\tau_1 > \tau_2 > \dots > \tau_8$ .

From Eq. (H) at  $t \rightarrow \infty$  and Eq. (B), we conclude that

$$c_0 = \frac{[E]_{\text{tot}}}{\|E_0\|}. \quad (\text{J})$$

The mean lifetimes of the transients,  $\tau_1, \dots, \tau_8$ , are associated with the eigenvectors  $\vec{E}_1, \dots, \vec{E}_8$ . The longest lasting transient is the one with the longest timescale,  $\tau_1$ ,

| Reaction parameters       |                                                    |            |
|---------------------------|----------------------------------------------------|------------|
| Symbol                    | Name                                               | Definition |
| $G^P$                     | Ratio between $k_f^P$ and $k_r^P$                  | Eq. (4)    |
| $\bar{k}$                 | Mean reaction velocity per enzyme molecule         | Eq. (2)    |
| $k_{\text{cat}}^S$        | Catalytic rate constant of substrate $S$           | Eq. (1)    |
| $k_{\text{off}}^S$        | Dissociation rate constant of substrate $S$        | Eq. (3)    |
| $k_f^P$                   | Phosphoryl group transfer rate                     | Eq. (4)    |
| $k_r^P$                   | Reverse phosphoryl group transfer rate             | Eq. (4)    |
| $K_d^S$                   | Equilibrium dissociation constant of substrate $S$ | Eq. (4)    |
| $K_m^S$                   | MM dissociation constant of substrate $S$          | Eq. (1)    |
| $v$                       | Reaction rate                                      | Eq. (1)    |
| $\bar{v}$                 | Mean reaction rate                                 | Eq. (2)    |
| $\omega^S$                | $On$ rate of substrate $S$                         | Eq. (3)    |
| Concentrations            |                                                    |            |
| Symbol                    | Substance                                          |            |
| $[E]$                     | Enzyme (P3P4P5)                                    |            |
| $[E]_{\text{tot}}$        | Total enzyme                                       |            |
| $[\cdot E \cdot]$         | Free enzyme                                        |            |
| $[A?P \cdot E \cdot]$     | Enzyme bound to ATP or ADP                         |            |
| $[\cdot E \cdot P1?]$     | Enzyme bound to P1P or P1                          |            |
| $[A?P \cdot E \cdot P1?]$ | Doubly bound enzyme                                |            |
| $[P1]$                    | Unphosphorilated                                   |            |
| $[P1P]$                   | Phosphorilated P1                                  |            |
| $[S]$                     | Substrate $S$                                      |            |

**Table A.** Symbols used in the paper. The role played by most of them are illustrated in Fig. 1.

which we will take as the *relaxation time*,  $\tau \equiv \tau_1$ . It means that the steady state is only reached when  $t \gg \tau$ . The steady state is the eigenvector  $\vec{E}_0$  of the null eigenvalue.

The use of the SDS sample buffer in the experiments to stop the chemical reaction means that the measure of  $[P1P]$  include the free and the bound proteins,

$$[P1P_T] = [P1P] + [ATP \cdot E \cdot P1P] + [ADP \cdot E \cdot P1P]. \quad (K)$$

Alternatively, we can calculate  $[P1P_T]$  from the net P1 phosphorylation rate

$$v(t) = k_f^P [ATP \cdot E \cdot P1] - k_r^P [ADP \cdot E \cdot P1P], \quad (L)$$

with  $[ATP \cdot E \cdot P1]$  and  $[ADP \cdot E \cdot P1P]$  obtained from Eq. (H). We can now calculate the total phosphorylated P1 as

$$[P1P_T](t) = \int_0^t v(t') dt'. \quad (M)$$

From this, we can write the mean phosphorylation rate as

$$\bar{v}(t) = \frac{1}{t} \int_0^t v(t') dt'. \quad (N)$$
