# Supplementary material for: A dual regulation mechanism of histidine kinase CheA identified by combining network-dynamics modeling and system-level input-output data
Source: PubMed Central journal article supplement (PMC6044545; doi:10.1371/journal.pcbi.1006305), 2018-07-02
Supplement: pcbi.1006305.s005.pdf [file pcbi.1006305.s005.pdf]

Supplementary Material to  
A dual regulation mechanism of histidine kinase CheA identified by combining  
network-dynamics modeling and system-level input-output data  
Bernardo A. Mello, Wenlin Pan, Gerald L. Hazelbauer, and Yuhai Tu

## Appendix 5

### The effective Michaelis-Menten parameters from simulations of the model

Figure A illustrate the dependence of the Michaelis-Menten parameters on the regulatory signal and substrate concentration. The simulations were performed for the same concentrations of the substrate that was held constant in the experiments, as indicated in the legends of Fig. 4. The Michaelis-Menten equation was used to obtain  $k_{\text{cat}}^S$  and  $K_m^S$  for the variable substrate.

The values of  $\sigma$  were not measured in the experiments. For this reason, it is not possible to compare the experimental results directly with Fig. A(a-d). To allow this comparison, we combined the points with the same  $\sigma$  from the curves of  $k_{\text{cat}}^{\text{P1}}$  and  $K_m^{\text{P1}}$  to create the curve of  $k_{\text{cat}}^{\text{P1}} \times K_m^{\text{P1}}$  of Fig. A(e). The same procedure was used to create Fig. A(f).

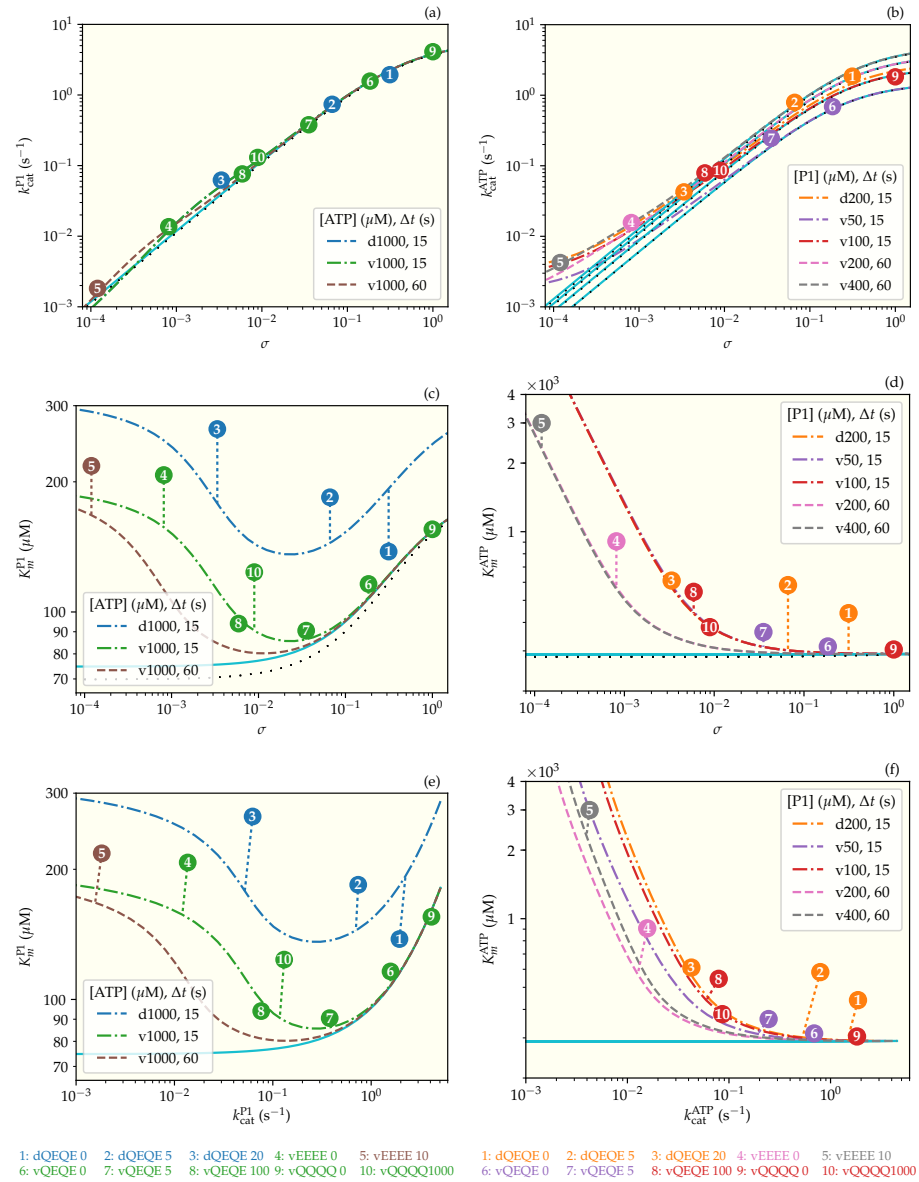

**Fig A.** Dependence of  $K_d^S$  and  $k_{cat}^S$  on  $\sigma$ . The curves show  $k_{cat}^S$  and  $K_m^S$  of the Michaelis-Menten equation, Eq. (1), for the phosphorylated rate predicted by the enzymatic reaction model. The parameters are calculated by fitting to curves similar to the continuous lines of Fig. 4. The simulations with  $\Delta t = \infty$  (steady states) are the continuous lines. Simulations for the regulatory signal  $\sigma$  ranging from  $10^{-3}$  to  $10^2$  were used to generate the curves of  $K_m^S$  and  $k_{cat}^S$  as functions of  $\sigma$  of plots (a), (b), (c), and (d).
